# Supplementary material
Source: publisher figshare collection journal article supplement (https://gsapubs.figshare.com/articles/dataset/_/22280872)
Supplement: Supplementary file 1 [file 1]

Chang, R., et al., 2023, Permian to Triassic protolith ages of type locality eclogites in the Eastern Alps: Implications for the opening of the Meliata back-arc basin: *Geology*, <https://doi.org/10.1130/G50903.1>.

## **Supplementary Material DR-Text 1: Analytical methods**

### *1.1 Zircon geochronology and geochemistry*

Zircon grains from eclogites (SA52A, SA53A, SA55A, SA56A) and an associated meta-pegmatite (SA-57A) from the same location as eclogite sample SA56A were separated for U–Pb dating by conventional heavy liquid and magnetic techniques at the Special Laboratory of the Geological Team of Hebei Province, Langfang, China. Internal structures of zircons were imaged using transmitted- and reflected-light optical microscopy and cathodoluminescence (CL) at the Institute of Geology, Chinese Academy of Geological Sciences, Beijing, China, and then spot positions for dating were selected.

U–Pb dating and trace element analysis of zircons were conducted synchronously by the LA–ICP–MS methodology at the State Key Laboratory of Continental Dynamics in the Northwest University, Xi'an, China. The laser-ablation system used is a GeoLas 200M equipped with a 193 nm ArF-excimer laser, and a homogenizing and imaging optical system (MicroLas, Göttingen, Germany). Spots were performed on the ELAN 6100 ICP-MS from Perkin Elmer/SCIEX (Canada) with a dynamic reaction cell (DRC). The laser-ablation spot size was set at 29  $\mu\text{m}$  and 54  $\mu\text{m}$  for large grains, and laser energy and frequency of 210 mJ and 10 Hz for 40 s were used. Harvard zircon 91500 with a weighted mean  $^{206}\text{Pb}/^{238}\text{U}$  age of  $1065.4 \pm 0.6$  Ma (Wiedenbeck et al., 2004; Liu et al., 2010) was used as an external standard and was analyzed twice every 5–10 analyses to correct for both instrumental mass bias and depth-dependent elemental and isotopic fractionation. The NIST610 was used as external reference and internal standard for Si to calibrate the trace element contents. Offline raw data

selection and background and time-drift correction of the zircon analysis were performed by the Glitter 4.0 software (Macquarie University, [Griffin et al., 2008](#)) after  $^{207}\text{Pb}/^{206}\text{Pb}$ ,  $^{206}\text{Pb}/^{238}\text{U}$ ,  $^{207}\text{Pb}/^{235}\text{U}$  and  $^{208}\text{Pb}/^{232}\text{Th}$  ratios were calculated. ISOPLOT version 4.15 were used to calculate and plot the U–Pb concordia diagrams and weighted mean ages ([Ludwig, 2012](#)).

## 1.2 Zircon Hf isotopic analysis

Zircon Lu–Hf isotopic analysis was performed at the State Key Laboratory of Continental Dynamics in the Northwest University, Xi'an, China, on the same zircon grains that were subjected to U–Pb dating by using a Nu Plasma MC-ICP-MS connected to a GeoLas 2005 193 nm laser system. Helium was used as a carrier gas. The spot size was set at 44  $\mu\text{m}$ , while the laser repetition rate was 10 Hz, and the energy density applied was 15–20 J/  $\text{cm}^2$ . Raw count rates for  $^{172}\text{Yb}$ ,  $^{173}\text{Yb}$ ,  $^{175}\text{Lu}$ ,  $^{176}(\text{Hf} + \text{Yb} + \text{Lu})$ ,  $^{177}\text{Hf}$ ,  $^{178}\text{Hf}$ ,  $^{179}\text{Hf}$  and  $^{180}\text{Hf}$  were collected simultaneously. The detailed analytical methodology followed that of [Yuan et al. \(2008\)](#). Standard zircons 91500 ([Wiedenbeck et al. 1995](#)) and GJ-1 ([Jackson et al. 2004](#)) were re-analyzed as an unknown sample to check the quality of the data during the analysis. The obtained  $^{176}\text{Hf}/^{177}\text{Hf}$  ratios of the 91500 and GJ-1 standards were  $0.282295 \pm 0.000022$  ( $n=5$ ,  $2\sigma$ ) and  $0.282029 \pm 0.000016$  ( $n=5$ ,  $2\sigma$ ), respectively, which are in good agreement with the recommended  $^{176}\text{Hf}/^{177}\text{Hf}$  ratios within  $2\sigma$  ( $0.282307 \pm 0.000058$ ,  $2\sigma$ ;  $0.282015 \pm 0.000019$ ,  $2\sigma$ ) ([Elhlou et al., 2006](#); [Griffin et al., 2006](#)).

The initial  $^{176}\text{Hf}/^{177}\text{Hf}$  values are expressed as  $\epsilon\text{Hf}(t)$ , which is calculated using the decay constant for  $^{176}\text{Lu}$  of  $1.867 \times 10^{-11}$  ([Söderlund et al., 2004](#)) and present-day chondritic ratios of  $^{176}\text{Hf}/^{177}\text{Hf}=0.282785$  and  $^{176}\text{Lu}/^{177}\text{Hf}=0.0336$  ([Bouvier et al., 2008](#)). Single-stage Hf model ages ( $T_{\text{DM1}}$ ) were calculated relative to a depleted mantle model with present-day  $^{176}\text{Hf}/^{177}\text{Hf}=0.28325$  and  $^{176}\text{Lu}/^{177}\text{Hf}=0.0384$  ratios ([Vervoort and Blichert-Toft, 1999](#); [Griffin et al., 2000](#)). Two-stage Hf model

ages ( $T_{DM2}$ ) were also calculated, using a  $^{176}\text{Lu}/^{177}\text{Hf}$  value of 0.015 for the average continental crust (Griffin et al., 2002).

For time calibration, vs. 2021/05 of the International Stratigraphic Chart (Cohen et al., 2013) is used.

### *1.3 Whole-rock geochemical analysis*

In addition to the dated samples, we collected further samples for geochemical analysis in each outcrop. These are similar in petrography varying slightly in the amount of main minerals and microfabrics. The major and trace element compositions of eleven eclogite samples (SA45A1–A4, SA52A, SA53A, SA55A, SA56A, KO30A, KO31A) of the SKC were generated using the XRF (Rigaku RIX 2100) and the ICP-MS (PE6 100 DRC), respectively. All the analyses were performed at the State Key Laboratory of Continental Dynamics, Northwest University, Xi'an, China. All samples were trimmed to remove weathered surfaces before being cleaned with deionized water and crushed to 200 mesh in an agate mill.

For major element analysis, 0.5 g sample powders were mixed with 5.2 g  $\text{Li}_2\text{B}_4\text{O}_7$ , 0.4 g LiF, 0.3 g  $\text{NH}_4\text{NO}_3$  and minor LiBr in a platinum pot and melted to a glass disc in a high frequency melting instrument prior to analysis. For trace element analysis, sample powders were digested using a HF +  $\text{HNO}_3$  mixture in high-pressure Teflon bombs at 190 °C for 48 h. Analyses of USGS and Chinese national rock standards (BCR-2, GSR-1 and GSR-3) indicate that both analytical precision and accuracy for major elements are generally better than 5 %, and for most of the trace elements except for the transition metals are better than 2 % and 10 %, respectively. In addition, one sample was selected randomly to be analyzed twice after every ten samples to assess the accuracy.

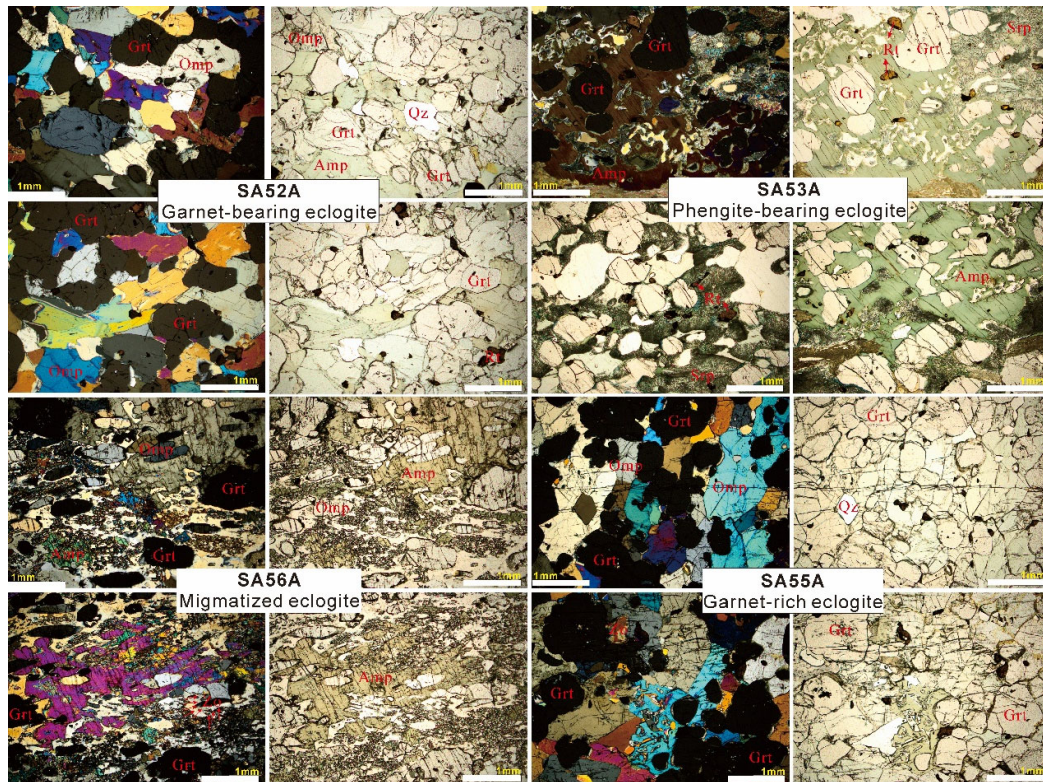

**DR-Fig. 1:** Microphotographs showing the mineralogy and microfabrics of studied eclogite samples. Abbreviations: Omp: omphacite, Grt: garnet, Qz: quartz, Amp: amphibole, Rt: rutile, Srp: serpentinized minerals, Ph: Phengite, Zo: zoisite.



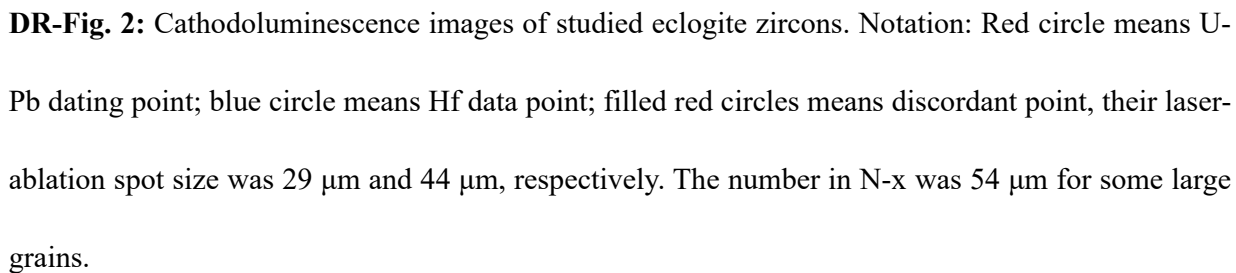

**DR-Fig. 2:** Cathodoluminescence images of studied eclogite zircons. Notation: Red circle means U-Pb dating point; blue circle means Hf data point; filled red circles means discordant point, their laser-ablation spot size was 29  $\mu\text{m}$  and 44  $\mu\text{m}$ , respectively. The number in N-x was 54  $\mu\text{m}$  for some large grains.

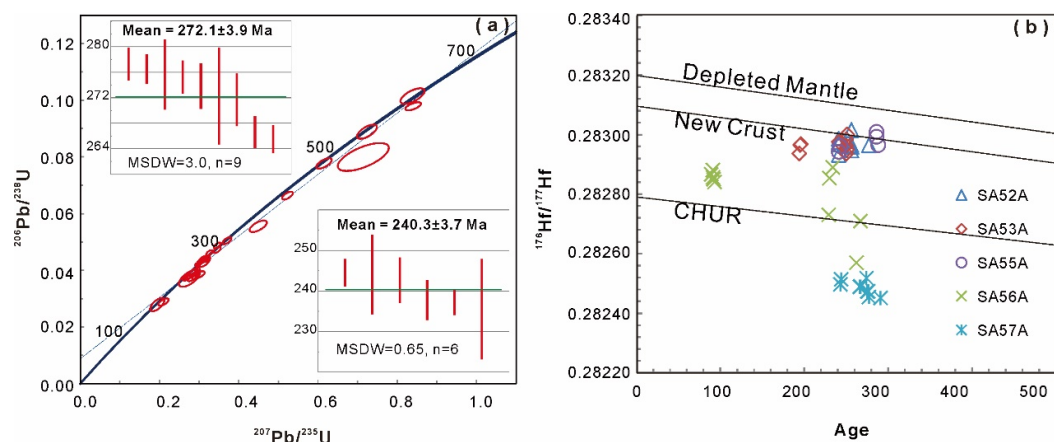

**DR-Fig. 3** Supplemental plot of Fig. 2 in the main text. U-Pb zircon age data (a) from meta-pegmatite samples (SA57A), weighed  $^{206}\text{Pb}/^{238}\text{U}$  mean ages are shown. CHUR: Chondritic Uniform Reservoir. New crust line is from Dhuime et al. (2011). In Hf isotopic diagrams (B), samples represent zircons from eclogites except SA57A, which is a Permian eclogite.

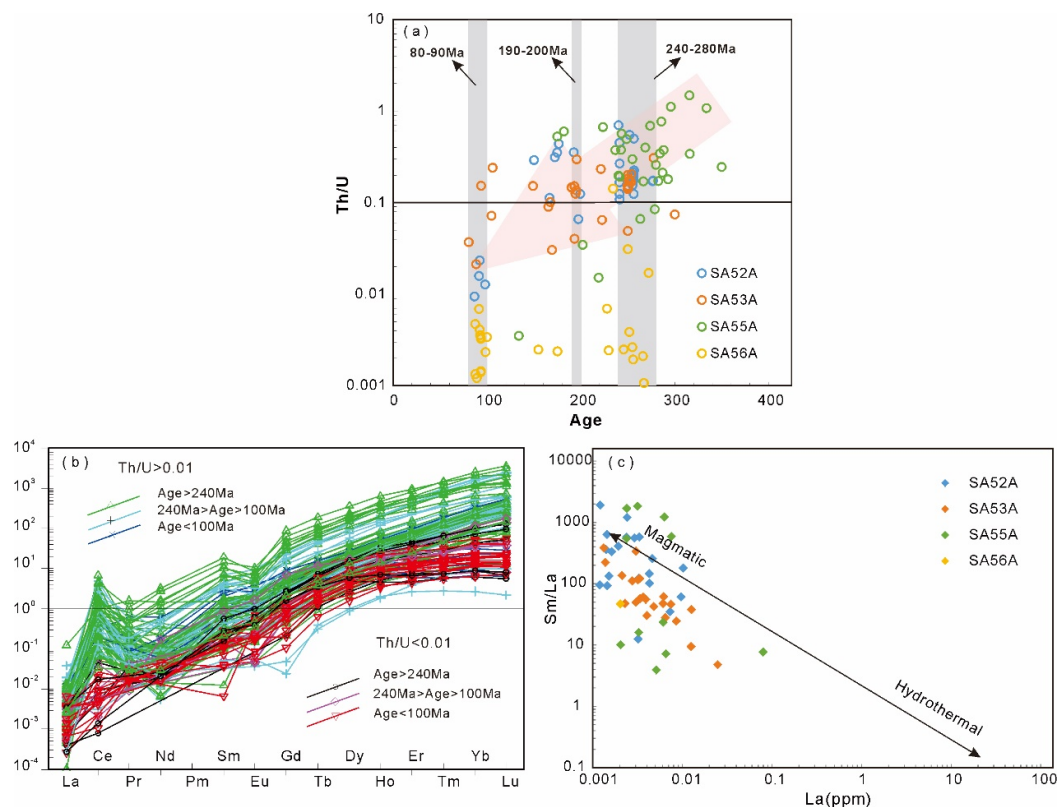



## REFERENCES

- Bouvier, A., Vervoort, J.D. and Patchett, P.J., 2008, The Lu-Hf and Sm-Nd isotopic composition of CHUR: Constraints from unequilibrated chondrites and implications for the bulk composition of terrestrial planets: *Earth and Planetary Science Letters*, v. 273(1–2), p. 48–57, <https://doi.org/10.1016/j.epsl.2008.06.010>.
- Cabanis, B. and Lecolle, M., 1989, Le diagramme La/10 – Y/15 – Nb/8: Un outil pour la discrimination des series volcaniques et en evidence des mélange et/ot de vontamination crustale: *Comptes Rendus de l'Académie des Sciences, Série II*, v. 309, p. 2023-2029.
- Cohen, K.M., Finney, S.C., Gibbard, P.L., and Fan, J.-X., 2013, The ICS International Chronostratigraphic Chart: *Episodes*, v. 36, p. 199–204, <https://doi.org/10.18814/epiiugs/2013/v36i3/002>
- Dhuime, B., Hawkesworth, C., and Cawood, P., 2011, When continents formed: *Science*, v. 331 (6014), p. 154–155, <https://doi.org/10.1126/science.1201245>
- Elhlou, S., Belousova, E., Griffin, W.L., Pearson, N.J., and O'Reilly, S.Y., 2006, Trace element and isotopic composition of GJ-red zircon standard by laser ablation: *Geochimica et Cosmochimica Acta*, v. 70(18), p. 158–158, <https://doi.org/10.1016/j.gca.2006.06.1383>.
- Griffin, W., 2008, GLITTER: data reduction software for laser ablation ICP-MS: *Laser Ablation ICP-MS in the Earth Sciences: Current practices and outstanding issues*, p. 308–311, <http://www.glitter-gemoc.com>.
- Griffin, W.L., Pearson, N.J., Belousova, E., Jackson, S.E., van Achterbergh, E., O'Reilly, S.Y., and Shee, S.R., 2000, The Hf isotope composition of cratonic mantle: LAM-MC-ICPMS analysis of zircon megacrysts in kimberlites: *Geochimica et Cosmochimica Acta*, v. 64(1), p. 133–147, [https://doi.org/10.1016/S0016-7037\(99\)00343-9](https://doi.org/10.1016/S0016-7037(99)00343-9).



- Griffin, W.L., Pearson, N.J., Belousova, E.A., and Saeed, A., 2006, Comment: Hf-isotope heterogeneity in zircon 91500: *Chemical Geology*, v. 233(3), p. 358–363, <https://doi.org/10.1016/j.chemgeo.2006.03.007>.
- Griffin, W.L., Wang, X., Jackson, S.E., Pearson, N.J., O'Reilly, S.Y., Xu, X.S., and Zhou, X.M., 2002, Zircon chemistry and magma mixing, SE China: In-situ analysis of Hf isotopes, Tonglu and Pingtan igneous complexes: *Lithos*, v. 61(3–4), p. 237–269, [https://doi.org/10.1016/S0024-4937\(02\)00082-8](https://doi.org/10.1016/S0024-4937(02)00082-8).
- Hollocher, K., Robinson, P., Walsh, E., and Roberts, D., 2012, Geochemistry of amphibolite-facies volcanics and gabbros of the Storen Nappe in extensions west and southwest of Trondheim, western gneiss region, Norway: A key to correlations and paleotectonic settings: *American Journal of Science*, v. 312, p. 357–416, <https://doi.org/10.2475/04.2012.01>.
- Hoskin, P.W.O., 2005, Trace-element composition of hydrothermal zircon and the alteration of Hadean zircon from the Jack Hills, Australia: *Geochimica et Cosmochimica Acta*, v. 69(3): 637–648, <https://doi.org/10.1016/j.gca.2004.07.006>.
- Irvine, T.N. and Baragar, W.R.A., 1971, A Guide to the Chemical Classification of the Common Volcanic Rocks: *Canadian Journal of Earth Sciences*, v. 8(5), p. 523–548, <https://doi.org/10.1139/e71-055>.
- Jackson, S.E., Pearson, N.J., Griffin, W.L., and Belousova, E.A., 2004, The application of laser ablation-inductively coupled plasma-mass spectrometry to in situ U–Pb zircon geochronology: *Chemical Geology*, v. 211(1), p. 47–69, <https://doi.org/10.1016/j.chemgeo.2004.06.017>.
- Liu, Y., Hu, Z., Zong, K., Gao, C., Gao, S., Xu, J., and Chen, H., 2010, Reappraisal and

refinement of zircon U-Pb isotope and trace element analyses by LA-ICP-MS: Chinese Science Bulletin, v. 55(15), p. 1535–1546, (In Chinese with English abstract), <https://doi.org/10.1007/s11434-010-3052-4>.

Ludwig, K., 2012. A geochronological toolkit for Microsoft Excel Berkeley Geochronology Center Sp. Pub, <https://searchworks.stanford.edu/view/6739593>.

McDonough, W.F. and Sun, S. S., 1995, The composition of the Earth: Chemical geology, v. 120(3–4), 223–253, [https://doi.org/10.1016/0009-2541\(94\)00140-4](https://doi.org/10.1016/0009-2541(94)00140-4).

Pearce, J.A., 1996, A user's guide to basalt discrimination diagrams. Trace element geochemistry of volcanic rocks: applications for massive sulphide exploration: Geological Association of Canada, Short Course Notes, v. 12(79), p. 113.

Pearce, J.A., 2008, Geochemical fingerprinting of oceanic basalts with applications to ophiolite classification and the search for Archean oceanic crust: Lithos, v. 100(1–4), p. 14–48, <https://doi.org/10.1016/j.lithos.2007.06.016>.

Pearce, J.A., and Gale, G.H., 1977, Identification of ore-deposition environment from trace-element geochemistry of associated igneous host rocks: Geological Society, London, Special Publication, v. 7, p. 14–24, <https://doi.org/10.1144/GSL.SP.1977.007.01.03>

Söderlund, U., Patchett, P.J., Vervoort, J.D., and Isachsen, C.E., 2004, The  $^{176}\text{Lu}$  decay constant determined by Lu–Hf and U–Pb isotope systematics of Precambrian mafic intrusions: Earth and Planetary Science Letters, v. 219(3), p. 311–324, [https://doi.org/10.1016/S0012-821X\(04\)00012-3](https://doi.org/10.1016/S0012-821X(04)00012-3).

Vervoort, J.D. and Blichert-Toft, J., 1999, Evolution of the depleted mantle: Hf isotope evidence from juvenile rocks through time: Geochimica et Cosmochimica Acta, v. 63(3), p. 533–556,

[https://doi.org/10.1016/S0016-7037\(98\)00274-9](https://doi.org/10.1016/S0016-7037(98)00274-9).

Wiedenbeck, M., Allégre, p., Corfu, F., Griffin, W.L., Meier, M., Oberli, F., Quadt, A. on, Roddick, J.C., and Spiegel, W., 1995, Three natural zircon standards for U-Th-Pb, Lu-Hf, trace element and ree analyses: *Geostandards Newsletter*, v. 19(1), p. 1–23,

<https://doi.org/10.1111/j.1751-908X.1995.tb00147.x>.

Winchester, J.A. and Floyd, P.A., 1977, Geochemical Discrimination of Different Magma Series and Their Differentiation Product Using Immobile Elements: *Chemical Geology*, v. 20, p. 325-343, [https://doi.org/10.1016/0009-2541\(77\)90057-2](https://doi.org/10.1016/0009-2541(77)90057-2)

Yuan, H.L., Gao, S., Dai, M.N., Zong, C.L., Günther, D., Fontaine, G.H., Liu, X.M., and Diwu, C., 2008, Simultaneous determinations of U–Pb age, Hf isotopes and trace element compositions of zircon by excimer laser-ablation quadrupole and multiple-collector ICP-MS: *Chemical Geology*, v. 247(1), p. 100–118, <https://doi.org/10.1016/j.chemgeo.2007.10.003>.
