# Supplementary material
Source: publisher figshare collection journal article supplement (https://gsapubs.figshare.com/articles/dataset/_/22280872)
Supplement: Supplementary file 1 [file 1]

## Sheet: Sheet1
DR-Table 2: U-Pb zircon analytical data.
	Th/U	Pb	Th	U	Pb	207Pb/206Pb		207Pb/235U		206Pb/238U		rho	208Pb/232Th		238U/232Th	207Pb/206Pb		207Pb/235U		206Pb/238U		208Pb/232Th		Con.
		Total	232	238	Common Pb	Ratio	1sigma	Ratio	1sigma	Ratio	1sigma		Ratio	1sigma	Ratio	Age(Ma)	1sigma	Age(Ma)	1sigma	Age(Ma)	1sigma	Age (Ma)	1sigma
SRM 610		3744.21	1099.36	894.428	19483.3	0.908821	0.0193793	25.1919	0.696359	0.200751	0.00403159	0.726518	0.425664	0.015042	0.860992	error	error	3315.68	27.0898	1179.35	21.6536	7168.02	213.257	4%
91500std		17.6464	28.8337	78.2367	22.0997	0.0748834	0.00119406	1.85369	0.0380722	0.179387	0.00260635	0.707407	0.0551937	0.00148828	2.88606	1064.82	32.56	1064.74	13.566	1063.63	14.2576	1085.89	28.5081	99%
91500std		17.5422	29.0462	78.7256	30.8884	0.0748766	0.0012691	1.84671	0.0393089	0.178953	0.00271525	0.712822	0.0528863	0.00143332	2.87894	1064.82	33.3325	1062.26	14.0395	1061.25	14.8578	1041.64	27.5154	99%
GJ-1		23.6697	10.2653	420.312	0	0.0600741	0.000765258	0.816204	0.0133943	0.0985151	0.00122841	0.759836	0.033212	0.00144556	43.4833	605.575	23.1425	605.928	7.49966	605.701	7.2161	660.381	28.2788	99%
SA52A - 1	0.196294	2.13874	10.4626	53.3005	25.4462	0.0531468	0.00271216	0.295497	0.0155342	0.0405683	0.000827979	0.388236	0.0126539	0.0009661	5.64283	344.5	119.43	262.877	12.1767	256.355	5.13127	254.158	19.283	97%
SA52A - 2	0.26701	1.6484	11.0799	41.4962	1.66849	0.0516972	0.00373838	0.266889	0.0183995	0.0381575	0.000571125	0.217108	0.0130701	0.000863	4.00608	272.285	166.645	240.203	14.7477	241.402	3.54879	262.465	17.2181	99%
SA52A - 3	0.0659922	0.846761	2.13335	32.3273	7.97034	0.0605339	0.00382018	0.253829	0.0151321	0.0310801	0.00075509	0.407529	0.0196675	0.00224921	16.5664	633.35	137.02	229.682	12.2554	197.305	4.7221	393.666	44.5848	84%
SA52A - 4	0.124638	1.33699	5.34187	42.8592	1.97802	0.0548275	0.00300402	0.303386	0.0167492	0.0405687	0.000796909	0.355811	0.0146688	0.00134591	8.50336	405.605	124.06	269.042	13.0495	256.357	4.93886	294.335	26.8106	95%
SA52A - 5	0.174001	1.17611	4.94069	28.3946	16.1228	0.0508971	0.00294986	0.302193	0.0169753	0.043882	0.00084057	0.340999	0.0128252	0.00115072	6.05312	235.25	133.315	268.111	13.2377	276.851	5.19303	257.577	22.9642	96%
SA52A - 6	0.3546	5.49024	36.8896	104.032	16.872	0.0543251	0.00892987	0.22106	0.031421	0.0303091	0.00228727	0.530925	0.0143458	0.00206812	2.91476	383.385	333.29	202.791	26.1288	192.483	14.3113	287.9	41.2101	94%
SA52A - 7	0.0127515	0.781199	0.15214	11.9312	43.7959	0.0651544	0.0139397	0.123429	0.0276288	0.0153212	0.000947805	0.276362	0.158507	0.0843284	93.9743	788.89	462.933	118.176	24.9717	98.018	6.01798	2973.87	1471.26	81%
SA52A - 8	0.124663	1.68298	5.49089	44.046	35.9388	0.0525371	0.00299032	0.274707	0.0162336	0.0381325	0.000675499	0.299767	0.0111774	0.0010128	8.50003	309.32	131.463	246.45	12.9322	241.247	4.19662	224.666	20.2446	97%
SA52A - 9	0.171699	0.325312	0.94121	5.48176	10.8608	0.0684122	0.00970022	0.340035	0.041357	0.0438353	0.00193198	0.36237	0.0187287	0.00376622	6.8444	881.17	291.652	297.198	31.338	276.562	11.9322	375.047	74.7243	92%
SA52A - 10	0.551227	14.4937	112.388	203.886	50.581	0.052624	0.00127906	0.290012	0.00911832	0.0398325	0.000779982	0.6228	0.0144782	0.000463211	1.91188	322.28	55.55	258.569	7.17928	251.795	4.83739	290.538	9.22891	97%
SRM 610		3788.04	1108.82	904.606	19592.5	0.917628	0.00871901	25.5575	0.317691	0.201441	0.00183945	0.734607	0.432491	0.00667263	0.856445	error	error	3329.76	12.3557	1183.05	9.89037	7264.58	94.1498	4%
91500std		17.5103	29.6626	79.4335	6.99725	0.0762215	0.00120793	1.88928	0.0367883	0.179421	0.00234176	0.670276	0.0537303	0.00146921	2.81404	1101.85	-0.46	1077.33	12.9493	1063.81	12.8123	1057.84	28.1819	98%
91500std		16.8088	26.9814	75.4904	38.1871	0.0735385	0.00127083	1.81112	0.033826	0.178919	0.00245312	0.73411	0.0543497	0.00136204	2.95096	1028.7	35.1875	1049.48	12.2388	1061.06	13.4261	1069.72	26.1107	98%
GJ-1		24.6944	10.2246	420.12	65.03	0.0604811	0.000848628	0.829442	0.0141815	0.0993322	0.00118031	0.69498	0.0328223	0.00153127	43.1713	620.39	29.6225	613.302	7.88208	610.494	6.92913	652.758	29.9668	99%
SA52A - 11	0.0157951	0.676007	0.0532396	3.37064	46.2709	0.14314	0.0329097	0.251897	0.0556373	0.0143085	0.00120202	0.380339	0.0555815	0.0381662	19.0488	2265.74	406.175	228.116	45.1263	91.5851	7.63954	1093.32	730.804	14%
SA52A - 12	0.313937	0.883541	8.55987	27.2662	5.44245	0.0576965	0.00514661	0.216302	0.01848	0.0270872	0.000667167	0.288289	0.00918579	0.000807508	3.34162	516.705	196.27	198.827	15.428	172.292	4.18844	184.818	16.173	85%
SA52A - 13	0.439627	6.10423	53.0904	120.762	7.09603	0.066693	0.00212385	0.256197	0.00902186	0.0277533	0.000443572	0.453865	0.0129944	0.000465182	2.41057	827.775	66.665	231.598	7.29406	176.472	2.78386	260.955	9.28175	72%
SA52A - 14	0.213383	1.35119	7.10313	33.2882	0	0.0525314	0.00336022	0.284735	0.0176345	0.0405714	0.00154308	0.614109	0.0198488	0.00393541	11.1253	309.32	144.425	254.407	13.9384	256.374	9.56046	397.259	77.9952	99%
SA52A - 15	0.124317	1.05804	5.5432	44.5893	0	0.0536736	0.0026346	0.226976	0.0110441	0.0314012	0.000617901	0.40441	0.0118086	0.00107727	8.37219	366.72	111.1	207.699	9.14064	199.312	3.86347	237.279	21.5198	95%
SA52A - 16	0.155353	1.94228	6.36392	40.9642	38.5437	0.0554667	0.00336572	0.305827	0.0197095	0.0403723	0.000858364	0.329905	0.0169556	0.00124818	6.43941	431.53	130.542	270.941	15.3268	255.14	5.32043	339.836	24.8079	93%
SA52A - 17	0.108538	1.84968	4.77669	44.0092	47.3262	0.0506106	0.0024466	0.265501	0.013583	0.0381452	0.000653315	0.334775	0.0137308	0.0015218	9.68888	233.4	112.948	239.091	10.8996	241.326	4.05889	275.642	30.3423	99%
SA52A - 18	0.174701	1.31208	2.24531	12.8523	66.9707	0.0491094	0.00532847	0.26982	0.0281767	0.0405339	0.00113023	0.267014	0.0128897	0.00168717	5.95627	153.79	237	242.55	22.5314	256.141	7.0035	258.864	33.6676	94%
SA52A - 19	0.291615	30.6627	71.7033	245.884	135.711	0.236707	0.00552187	0.780311	0.0267193	0.0235404	0.000442817	0.549356	0.0525898	0.00176625	3.53751	3097.84	37.345	585.661	15.2443	149.992	2.79011	1035.95	33.9163	-19%
SA52A - 20	0.0233994	0.255386	0.702804	30.0351	0	0.0513653	0.00691962	0.0927067	0.0119129	0.0144317	0.000737718	0.397801	0.0213902	0.00262072	47.1684	257.47	281.455	90.0217	11.0701	92.3677	4.68825	427.785	51.8614	97%
SRM 610		3785.2	1098.26	895.168	20039.7	0.910664	0.00928274	25.4705	0.347085	0.20275	0.00183942	0.665765	0.433202	0.00714128	0.849069	error	error	3326.43	13.5046	1190.08	9.87969	7274.61	100.712	5%
91500std		16.4953	26.5584	73.654	39.7849	0.0746168	0.00152385	1.8441	0.0452184	0.179183	0.00234512	0.533749	0.0538054	0.00150887	2.89373	1057.41	40.7425	1061.33	16.1597	1062.51	12.8332	1059.28	28.9404	99%
91500std		16.7391	27.6198	76.0246	10.4995	0.0751432	0.00126177	1.8563	0.0393402	0.179157	0.00229896	0.605492	0.0542746	0.00158762	2.87127	1072.22	33.33	1065.67	14.0038	1062.37	12.5814	1068.28	30.4374	99%
GJ-1		24.1516	10.0196	423.031	62.5959	0.0602995	0.000794702	0.808062	0.0137792	0.0973735	0.00126891	0.764209	0.0305758	0.0014267	44.3644	612.98	27.7725	601.367	7.74901	598.998	7.46113	608.745	27.9813	99%
SA52A - 21	0.451296	7.23039	53.6952	118.98	78.629	0.0495862	0.00150301	0.26086	0.00871892	0.0381308	0.000683811	0.536543	0.0120986	0.000421957	2.36141	176.01	76.84	235.359	7.02326	241.237	4.24822	243.072	8.42675	97%
SA52A - 22	0.700947	7.06105	70.4946	100.571	0	0.0496446	0.00249257	0.257677	0.012631	0.0379538	0.000550454	0.295871	0.0119568	0.000504269	1.56664	188.97	121.28	232.793	10.1989	240.137	3.42116	240.24	10.072	96%
SA52A - 23	0.201809	0.807438	4.59163	22.7523	0	0.0514162	0.00397936	0.282989	0.0226948	0.040534	0.000883582	0.271814	0.0140368	0.00160814	5.48616	261.175	174.977	253.026	17.9619	256.142	5.4758	281.742	32.0542	98%
SA52A - 24	0.49996	8.0455	60.3676	120.745	30.8594	0.0506284	0.00171463	0.281831	0.00976528	0.0405834	0.000676459	0.481057	0.0135571	0.000587349	2.82947	233.4	79.615	252.109	7.73732	256.448	4.19295	272.178	11.7128	98%
SA52A - 25	0.352249	4.38667	35.668	101.258	30.0601	0.0610573	0.00373148	0.231029	0.0149546	0.0274684	0.000437213	0.245897	0.0117984	0.000574894	3.18389	642.61	131.463	211.048	12.3357	174.684	2.74473	237.076	11.4844	81%
SA52A - 26	0.166795	0.956578	4.83841	29.0081	5.263	0.0525004	0.00306292	0.276182	0.0164537	0.0381123	0.000770045	0.339142	0.0126048	0.00131197	6.68034	305.615	133.315	247.624	13.0923	241.122	4.78355	253.178	26.1877	97%
SA52A - 27	0.00942847	0.61165	0.0309262	3.28009	42.7116	0.134415	0.0397806	0.133563	0.0144622	0.0135483	0.00109158	0.744085	0.0394627	0.0119079	24.8982	2166.66	538.89	127.295	12.9547	86.7519	6.94287	782.294	231.548	62%
SA52A - 28	0.112459	1.59875	7.50345	66.7217	27.2935	0.0509917	0.0031745	0.182064	0.0118055	0.0261933	0.000586641	0.345399	0.00853659	0.000753423	10.0365	238.955	144.425	169.835	10.1415	166.679	3.6863	171.811	15.0995	98%
SA52A - 29	0.18775	3.10333	8.66014	46.1258	106.003	0.0517633	0.00676856	0.289926	0.047429	0.040483	0.00194257	0.293323	0.0238017	0.0107598	5.85639	275.99	274.045	258.501	37.3348	255.826	12.0362	475.45	212.424	98%
SA52A - 30	0.225741	2.07132	5.9742	26.4649	71.3446	0.0534827	0.00341576	0.300381	0.0178241	0.0406399	0.000905453	0.375472	0.0151218	0.00133426	5.33716	350.055	144.425	266.698	13.9189	256.798	5.61069	303.358	26.5667	96%
GJ-1		24.1377	10.0643	414.556	8.26513	0.0588057	0.0008747	0.817084	0.0134716	0.100881	0.00130051	0.781898	0.0328457	0.00142461	48.585	561.145	31.4775	606.42	7.53921	619.57	7.62272	653.215	27.8788	97%
91500std		20.8923	36.8872	91.8288	0	0.0754344	0.00125434	1.86814	0.0388914	0.179465	0.00261592	0.700166	0.0531233	0.00119062	2.93276	1079.63	33.3325	1069.87	13.7876	1064.05	14.3089	1046.19	22.8511	99%
91500std		22.7822	39.2443	94.2672	44.4858	0.0743256	0.00123167	1.83226	0.0359893	0.178875	0.0026095	0.742711	0.0549567	0.00128508	2.83224	1050.01	33.335	1057.09	12.9224	1060.83	14.281	1081.35	24.6212	99%
SRM 610		3749.3	1096.5	891.03	19512.7	0.911845	0.00742521	25.0638	0.279314	0.198888	0.00177134	0.799186	0.437208	0.00553358	0.960593	error	error	3310.71	11.1118	1169.34	9.54541	7331.03	77.8218	4%
SRM 610		3565.69	638.884	596.038	105766	0.89874	0.0196956	24.9869	0.643901	0.201173	0.00395916	0.763706	0.437487	0.0128563	1.01233	error	error	3307.7	25.2594	1181.62	21.2574	7334.95	180.77	5%
91500std		18.8572	30.9179	82.4129	24.8177	0.0751531	0.00126455	1.86063	0.0385558	0.179259	0.0025832	0.695423	0.0554148	0.00125462	2.89084	1072.22	33.33	1067.21	13.7046	1062.93	14.1327	1090.12	24.0273	99%
91500std		22.207	32.0269	84.6439	257.692	0.0746069	0.00126593	1.83977	0.0339298	0.179081	0.00268667	0.813478	0.0526652	0.00117052	2.87416	1057.41	29.165	1059.78	12.1533	1061.95	14.7001	1037.4	22.4752	99%
GJ-1		16.8919	7.12925	307.552	0	0.0590706	0.000768867	0.799753	0.0153312	0.0978978	0.00143442	0.76433	0.0303198	0.00126107	46.832	568.55	27.77	596.69	8.65907	602.078	8.42859	603.723	24.739	99%
SA53A - 1	0.07419	0.493602	1.34139	18.0805	0	0.0563427	0.00672621	0.355171	0.0396319	0.0476541	0.00152205	0.286233	0.0338209	0.018801	17.6313	464.86	266.63	308.603	29.6956	300.103	9.36684	672.291	367.578	97%
SA53A - 2	0.0370472	3.07327	0.182913	4.93729	216.839	0.119191	0.0232983	0.216727	0.0422654	0.0125851	0.000619008	0.252214	0.0365349	0.016573	31.564	1944.14	355.71	199.182	35.2716	80.6223	3.94102	725.283	323.17	15%
SA53A - 3	0.171651	3.65518	6.23121	36.3016	176	0.0504842	0.00256186	0.276193	0.0148706	0.0396655	0.00067958	0.318209	0.0136637	0.00100103	6.34581	216.74	118.502	247.633	11.8328	250.759	4.21589	274.304	19.9603	98%
SA53A - 4	0.146053	0.101576	0.43901	3.00582	0	0.0662769	0.0135653	0.301332	0.0598056	0.0396603	0.00195583	0.248472	0.0316039	0.00502171	8.44128	816.665	438.86	267.44	46.6646	250.727	12.1279	628.899	98.3905	93%
SA53A - 5	0.151922	1.84383	1.2438	8.18707	122.809	0.0374341	0.00725608	0.109238	0.0198493	0.023405	0.00072145	0.16964	0.0115066	0.00217932	7.28293	error	error	105.268	18.17	149.14	4.54511	231.247	43.5479	65%
SA53A - 6	0.071833	0.0250029	0.155218	2.16081	0	0.16201	0.0595459	0.257498	0.0604734	0.0163809	0.0012277	0.319126	0.0446037	0.0104206	19.0292	2476.84	661.423	232.649	48.8303	104.743	7.78689	882.012	201.631	24%
SA53A - 7	0.101635	2.34184	12.0763	118.82	4.28629	0.0520091	0.0029354	0.186818	0.00949341	0.0263053	0.000419021	0.313465	0.00927898	0.00051872	10.6355	287.1	129.613	173.91	8.12296	167.383	2.6335	186.684	10.3881	96%
SA53A - 8	0.0402712	2.19007	0.0468375	1.16305	138.151	0.386631	0.067894	1.38977	0.271841	0.0304475	0.00297886	0.500179	0.471587	0.0834152	18.5893	3857.88	268.978	884.599	115.503	193.349	18.6358	7808.82	1145.71	-29%
SA53A - 9	0.153039	0.66191	3.16368	20.6724	0	0.0545769	0.0042054	0.295468	0.0227227	0.0395524	0.000930882	0.306035	0.0162234	0.00168079	7.40638	394.495	176.833	262.854	17.8109	250.058	5.77411	325.279	33.4301	95%
SA53A - 10	0.20559	5.02108	6.30271	30.6566	284.027	0.0545285	0.00281643	0.300273	0.0163869	0.0401315	0.000790321	0.360858	0.0125505	0.00092237	5.3764	394.495	116.655	266.613	12.7978	253.648	4.90008	252.095	18.4121	95%
SRM 610		3573.8	645.888	604.542	104729	0.912794	0.00729705	25.5677	0.311287	0.202831	0.00208776	0.845428	0.432402	0.00610596	1.006	error	error	3330.15	12.1106	1190.51	11.2075	7263.32	86.1595	5%
91500std		21.3827	31.6165	84.6702	220.96	0.0744313	0.00106331	1.837	0.0379519	0.179259	0.00325377	0.878582	0.0530449	0.00133583	2.88492	1053.71	25	1058.79	13.6023	1062.93	17.796	1044.69	25.6401	99%
91500std		18.6738	31.072	83.5642	6.79076	0.0753287	0.00108298	1.8634	0.0390991	0.179081	0.00281424	0.748945	0.0550351	0.00130433	2.88008	1077.47	27.775	1068.19	13.8839	1061.95	15.397	1082.85	24.9883	99%
GJ-1		16.7466	7.13212	307.907	0	0.0603535	0.000829026	0.811921	0.0161671	0.0975774	0.00160193	0.824472	0.0317309	0.00175705	46.4347	616.685	34.2525	603.531	9.06918	600.196	9.41422	631.388	34.4216	99%
SA53A - 11	0.0304824	2.22252	1.10513	36.2547	122.772	0.0521278	0.00328617	0.189653	0.0119306	0.0266178	0.000613158	0.366185	0.0105054	0.00278804	37.3159	300.06	144.425	176.334	10.1836	169.345	3.85128	211.23	55.7667	95%
SA53A - 12	0.146904	2.17182	9.64456	65.6522	44.6386	0.0523443	0.0021398	0.212978	0.00889044	0.0299374	0.000705468	0.564515	0.00980326	0.000547343	7.37199	301.91	89.8025	196.049	7.44337	190.157	4.41674	197.181	10.9556	96%
SA53A - 13	0.16903	1.26438	6.89826	40.8108	0	0.0488755	0.0026156	0.26834	0.0153668	0.0397847	0.000761177	0.334095	0.0127756	0.000939879	6.32823	142.68	125.907	241.365	12.3032	251.499	4.72107	256.588	18.7574	95%
SA53A - 14	0.183399	2.34307	7.85065	42.8065	68.2702	0.0501704	0.00266064	0.273347	0.0150748	0.0396227	0.000671222	0.307174	0.0117062	0.000871602	5.94272	211.185	122.205	245.367	12.022	250.494	4.16426	235.234	17.4132	97%
SA53A - 15	0.136643	6.69669	5.00612	36.6365	419.539	0.0490649	0.00329935	0.206734	0.0137329	0.0307221	0.000560508	0.274652	0.00975147	0.000895433	8.05362	150.085	151.825	190.809	11.556	195.066	3.50715	196.144	17.9239	97%
SA53A - 16	0.125015	2.41005	11.6925	93.5287	21.517	0.0495511	0.00179622	0.210174	0.00850159	0.0306059	0.000442351	0.357306	0.0105883	0.000620343	8.69445	172.305	85.17	193.699	7.13438	194.339	2.76888	212.889	12.4071	99%
SA53A - 17	0.0901203	3.54563	2.1621	23.9912	223.347	0.056904	0.00452788	0.198966	0.0149866	0.0259978	0.000705902	0.360482	0.010508	0.00141719	12.2765	487.08	175.905	184.251	12.6925	165.451	4.43613	211.282	28.3467	89%
SA53A - 18	0.152818	4.29549	11.694	76.5224	242.268	0.0541925	0.00342272	0.109449	0.00696709	0.0146553	0.000287456	0.308133	0.0053637	0.000374235	7.14635	388.94	142.577	105.461	6.37678	93.7884	1.827	108.123	7.52376	88%
SA53A - 19	0.145228	5.12594	2.64493	18.2123	335.246	0.0540846	0.00469898	0.217152	0.0193168	0.0299534	0.000906887	0.340358	0.0120332	0.00183243	7.62844	375.98	200.9	199.537	16.1152	190.257	5.67708	241.766	36.5971	95%
SA53A - 20	0.297758	3.95803	16.7217	56.1586	154.85	0.0538156	0.00266498	0.224842	0.0100756	0.030808	0.000658394	0.4769	0.00937772	0.000570305	3.76202	364.87	108.323	205.932	8.35378	195.603	4.11879	188.661	11.42	94%
SRM 610		3585.13	640.82	595.155	107003	0.907612	0.00884196	25.263	0.305514	0.201389	0.00190294	0.781346	0.440303	0.00648277	1.01699	error	error	3318.44	12.0254	1182.78	10.2307	7374.5	90.9748	5%
91500std		20.1937	31.0982	81.9381	135.933	0.0757579	0.00138601	1.87053	0.0399009	0.178963	0.00260638	0.682744	0.0553106	0.00143349	2.89627	1088.58	36.725	1070.72	14.1328	1061.3	14.2629	1088.13	27.4555	99%
91500std		20.2382	31.3784	82.2425	162.277	0.0740021	0.00127632	1.82987	0.0372983	0.179377	0.00278501	0.761711	0.0527694	0.00131773	2.86873	1042.6	35.1875	1056.23	13.4022	1063.57	15.2336	1039.4	25.2993	99%
GJ-1		19.1872	7.17769	305.989	152.113	0.0603562	0.000751591	0.815522	0.0140663	0.0979454	0.00150459	0.890617	0.0329028	0.00153061	46.6003	616.685	25.92	605.547	7.87772	602.357	8.83994	654.333	29.9516	99%
SA53A - 21	0.151772	0.698885	4.16754	27.4591	5.5801	0.0591568	0.0049336	0.243591	0.0190011	0.0304144	0.000667819	0.281489	0.00882598	0.00102317	7.89932	572.255	178.68	221.357	15.515	193.141	4.17927	177.61	20.4997	86%
SA53A - 22	0.167711	2.07672	10.5629	62.9827	0	0.0563224	0.00183928	0.312114	0.0122762	0.0401361	0.000859472	0.544435	0.0132651	0.000895193	6.50664	464.86	104.618	275.818	9.50182	253.676	5.32848	266.355	17.857	91%
SA53A - 23	0.241	1.15264	4.93176	20.4637	55.8258	0.0519239	0.00614737	0.115836	0.0130998	0.0166023	0.00049361	0.2629	0.00783721	0.000890329	5.43571	283.395	248.125	111.29	11.9208	106.147	3.13057	157.79	17.8556	95%
SA53A - 24	0.200615	1.56076	8.45083	42.1247	0	0.05184	0.00244701	0.280613	0.0127128	0.0395555	0.000607891	0.339224	0.0145749	0.000855366	5.41617	279.69	109.243	251.144	10.0813	250.077	3.77203	292.466	17.0405	99%
SA53A - 25	0.140464	0.614369	3.10466	22.1029	0	0.0497054	0.00341857	0.271291	0.0178209	0.0395546	0.000776141	0.29871	0.0118827	0.00156513	7.71348	188.97	165.72	243.725	14.2345	250.072	4.81485	238.761	31.2632	97%
SA53A - 26	0.0212359	1.77111	0.165097	7.77446	122.575	0.136177	0.0441163	0.160952	0.0307628	0.0138255	0.000677313	0.256319	0.0610012	0.0252144	64.8285	2179.32	562.038	151.536	26.9057	88.5143	4.30696	1196.83	480.337	47%
SA53A - 27	0.0646951	0.333552	1.16766	18.0487	0.000406324	0.0563493	0.0048568	0.268045	0.0227434	0.0351313	0.000901316	0.302369	0.0101402	0.00214356	18.4052	464.86	197.197	241.13	18.2124	222.583	5.61435	203.924	42.8912	92%
SA53A - 28	0.0490002	3.16566	0.982007	20.0409	193.027	0.0503807	0.0034224	0.273229	0.0191171	0.0395529	0.00100359	0.362646	0.0178254	0.00334327	24.9266	213.035	152.757	245.272	15.2465	250.061	6.22487	357.117	66.3915	98%
SA53A - 29	0.307511	6.2556	24.3558	79.2032	174.047	0.0531888	0.00218394	0.322863	0.0136726	0.0439973	0.000797471	0.42801	0.0140734	0.000943467	5.05117	344.5	92.5825	284.102	10.4964	277.563	4.92646	282.471	18.8049	97%
SA53A - 30	0.233026	4.21707	29.3241	125.84	0	0.0523008	0.0014014	0.251496	0.00691331	0.0349477	0.000513733	0.534768	0.011244	0.000429672	4.589	298.21	65.735	227.791	5.61115	221.44	3.20214	225.998	8.58806	97%
SRM 610		3599.8	645.03	602.822	106216	0.914924	0.00946478	25.3055	0.323421	0.200048	0.00190115	0.743584	0.4297	0.00652948	0.992704	error	error	3320.08	12.6864	1175.58	10.2323	7225.15	92.3098	4%
91500std		16.5457	26.4336	72.2282	38.9761	0.0756103	0.00130542	1.86862	0.0365137	0.179128	0.0023752	0.678581	0.0541136	0.00147036	2.89226	1084.88	35.1825	1070.04	12.9449	1062.21	12.9981	1065.19	28.1937	99%
91500std		16.1704	26.9313	73.4156	4.74421	0.0741497	0.0015195	1.83178	0.0427633	0.179212	0.00280614	0.670724	0.0539664	0.00137503	2.87274	1055.56	41.825	1056.92	15.3504	1062.67	15.3511	1062.37	26.3693	99%
GJ-1		17.3469	7.07779	312.324	0	0.060885	0.000855471	0.819851	0.0149116	0.0976954	0.00154308	0.868407	0.0318922	0.0014293	46.6798	635.2	29.6275	607.965	8.3302	600.889	9.06781	634.546	27.9964	98%
SRM 610		2298.09	635.949	604.549	14742.5	0.908666	0.0176307	24.863	0.663089	0.198273	0.00391152	0.739713	0.427497	0.0123495	1.02521	error	error	3302.85	26.1296	1166.04	21.0524	7193.99	174.859	4%
91500std		17.5096	28.3432	76.3163	25.2527	0.0745821	0.00116233	1.84626	0.0389092	0.179288	0.0025156	0.66578	0.0546834	0.00119651	2.90065	1057.41	31.485	1062.1	13.8994	1063.08	13.7631	1076.11	22.9303	99%
91500std		17.2679	29.0312	77.216	0	0.0751779	0.00107677	1.85414	0.0365306	0.179052	0.00280739	0.795809	0.0533966	0.00118913	2.86435	1073.15	28.855	1064.9	13.0162	1061.79	15.36	1051.44	22.8166	99%
GJ-1		14.7969	6.17523	262.992	0	0.059773	0.000854897	0.80803	0.015383	0.0980264	0.00136897	0.733559	0.0327528	0.00158343	46.3482	594.47	31.4725	601.348	8.64874	602.833	8.04368	651.397	30.9896	99%
SA55A - 1	0.00351449	0.00852394	0.00272736	0.776031	0	0.253002	0.0654879	0.678321	0.18863	0.0210015	0.00287711	0.492641	0.0018895	0	2.20781	3203.39	420.988	525.759	114.122	133.982	18.1657	38.155	0	-19%
SA55A - 2	0.258785	0.497329	0.534185	2.0642	26.9069	0.0565747	0.0111594	0.386031	0.102325	0.0443818	0.00239834	0.203866	0.0375497	0.00501699	4.59357	475.97	385.135	331.466	74.9621	279.936	14.8045	745.062	97.7347	83%
SA55A - 3	1.48708	0.594085	3.38848	2.27862	15.7096	0.0821102	0.0150085	0.591214	0.126486	0.0501759	0.00277062	0.258096	0.0168277	0.00134458	0.79134	1249.99	363.428	471.643	80.714	315.602	17.008	337.295	26.7273	60%
SA55A - 4	0.668715	0.356942	3.57692	5.34895	1.03428	0.0729773	0.008473	0.358786	0.042247	0.0352911	0.00148896	0.358308	0.0125553	0.00185991	3.13695	1012.96	232.868	311.308	31.5707	223.579	9.27202	252.19	37.1267	67%
SA55A - 5	0.69275	1.05663	7.73668	11.1681	10.1141	0.0681204	0.00682311	0.396998	0.0351257	0.0434146	0.000988972	0.257461	0.0129677	0.000919964	1.7598	872.215	241.66	339.468	25.5315	273.964	6.11185	260.421	18.3565	78%
SA55A - 6	0.212523	0.0666976	0.229554	1.08013	0.403292	0.122164	0.0295375	0.581856	0.110614	0.0455354	0.00273106	0.315491	0.0671801	0.0200925	6.85106	1987.96	442.288	465.654	71.0032	287.053	16.8395	1314.19	380.549	52%
SA55A - 7	0.565345	3.27251	27.9692	49.4728	10.9719	0.0576268	0.00240525	0.303334	0.0125913	0.03849	0.000680794	0.426108	0.0130157	0.000410426	1.90908	516.705	92.5775	269.001	9.81112	243.467	4.22807	261.379	8.18904	90%
SA55A - 8	0.170993	0.0346583	0.119704	0.700053	0	0.25188	0.114927	0.612787	0.162657	0.0422108	0.00327316	0.292133	0.0927566	0.0203681	7.54574	3198.15	793.753	485.316	102.407	266.522	20.2461	1792.9	376.74	41%
SA55A - 9	0.298133	0.612444	0.600235	2.01331	35.0798	0.106499	0.0186412	0.495916	0.0636723	0.0403361	0.00220871	0.426483	0.0309898	0.00557123	3.96426	1740.43	321.295	408.934	43.2197	254.916	13.6869	616.863	109.222	53%
SA55A - 10	0.600664	0.672377	3.48373	5.7998	0	0.31077	0.0357407	1.1757	0.154369	0.0286196	0.00133942	0.356442	0.0301087	0.00347872	1.88634	3525.01	178.398	789.307	72.0451	181.903	8.39481	599.581	68.2575	-26%
SRM 610		2314.18	640.978	610.972	15050.2	0.912346	0.00733993	25.493	0.317827	0.202553	0.00199313	0.78927	0.445399	0.00587116	1.03559	error	error	3327.29	12.3895	1189.02	10.7036	7445.89	82.1013	5%
91500std		17.6945	30.743	81.8921	0	0.0757953	0.00109307	1.8767	0.0417006	0.17935	0.00293165	0.735639	0.0538953	0.00126165	2.8884	1100	28.5475	1072.9	14.737	1063.42	16.0349	1061	24.1966	99%
91500std		18.4141	32.1503	84.9664	0	0.0739647	0.00107963	1.8237	0.0374203	0.17899	0.002824	0.768919	0.0541847	0.00116751	2.8766	1040.44	29.3225	1054.01	13.4752	1061.46	15.4515	1066.55	22.3851	99%
GJ-1		14.7705	6.47531	270.071	0	0.0601872	0.00077862	0.810029	0.0156603	0.0976793	0.00152356	0.806784	0.0325799	0.00178009	45.7088	609.28	27.7725	602.47	8.79459	600.795	8.95337	648.012	34.8444	99%
SA55A - 11	0.3759	1.18753	2.92723	7.78726	50.8528	0.0725552	0.00894749	0.366553	0.0437066	0.0374072	0.0011131	0.249556	0.0186472	0.00180583	3.06389	1011.11	253.697	317.096	32.4758	236.741	6.91793	373.43	35.8317	70%
SA55A - 12	0.192395	0.0836361	0.48148	2.50256	0	0.109018	0.0185841	0.477135	0.0600983	0.0381458	0.00187488	0.390216	0.0196555	0.00435697	7.27766	1783.34	314.965	396.106	41.3124	241.33	11.6429	393.428	86.3665	51%
SA55A - 13	1.11858	1.08162	8.35417	7.46856	3.4423	0.0668683	0.00589354	0.425878	0.0357103	0.0469869	0.0012356	0.313612	0.0181466	0.000990671	1.00168	835.18	184.097	360.246	25.4309	295.996	7.60941	363.495	19.6668	80%
SA55A - 14	0.341426	0.38817	0.41214	1.20711	24.4525	0.134498	0.0281186	0.638992	0.13751	0.0502465	0.00392581	0.363066	0.0218689	0.00318067	3.70417	2157.72	372.067	501.682	85.1903	316.035	24.0972	437.256	62.9125	54%
SA55A - 15	0.0151873	0.0513188	0.00112381	0.0739967	0.742046	0.299476	0.151904	5.60441	3.1852	0.0345461	0.0128604	0.65501	0	0	0.0746333	3467.6	885.803	1916.78	489.706	218.938	80.1353			-59%
SA55A - 16	0.172482	0.393652	0.244489	1.41748	22.0094	0.0824011	0.0168428	0.480982	0.108514	0.0448232	0.00228543	0.225999	0.0742289	0.0199139	8.71823	1255.24	408.952	398.746	74.3995	282.661	14.1016	1447.26	374.691	65%
SA55A - 17	0.399905	0.829993	0.475704	1.18954	53.9821	0.163847	0.0344516	0.687036	0.0969672	0.0425472	0.00321728	0.535762	0.0283621	0.00599295	3.21832	2495.99	356.017	531.018	58.3632	268.603	19.894	565.281	117.79	34%
SA55A - 18	0.0847739	0.0270071	0.0147284	0.173737	1.68378	0.231634	0.0703869	3.14227	0.872755	0.0441799	0.00906151	0.73846	0.0819691	0.0446973	1.96538	3064.82	505.868	1443.11	213.938	278.69	55.9429	1592.37	834.989	-36%
SA55A - 19	0.197196	0.389627	0.349107	1.77035	25.1459	0.0739375	0.0156897	0.352019	0.0739593	0.037952	0.00208324	0.261264	0.0239676	0.00451296	6.86027	1038.89	439.332	306.239	55.5447	240.126	12.9391	478.724	89.0818	75%
SA55A - 20	0.0663007	0.362897	0.302746	4.56626	14.8329	0.0669453	0.00865271	0.364363	0.0440945	0.041697	0.0015374	0.304672	0.0426171	0.00600459	18.76	835.18	272.668	315.467	32.8166	263.343	9.5151	843.537	116.405	81%
SRM 610		2347.2	650.341	618.638	15058.3	0.900058	0.00722373	25.0961	0.28399	0.201896	0.00187986	0.822815	0.430406	0.00573749	1.03418	error	error	3311.96	11.277	1185.5	10.103	7235.13	81.0731	5%
91500std		19.9475	33.1732	87.759	16.4113	0.074864	0.00108415	1.8492	0.0330923	0.179357	0.00265797	0.828113	0.0542594	0.00123537	2.86883	1064.82	29.6275	1063.15	11.8154	1063.46	14.5399	1067.98	23.6844	99%
91500std		19.6707	33.298	88.5014	0	0.074896	0.00108295	1.8512	0.0371607	0.178983	0.00265126	0.737921	0.0538206	0.001212	2.89617	1065.74	29.165	1063.86	13.2536	1061.42	14.5078	1059.57	23.2461	99%
GJ-1		15.5739	6.31774	269.115	67.0429	0.0584311	0.000744338	0.789386	0.0144353	0.0979388	0.00147105	0.821362	0.0287247	0.0013582	46.3845	546.33	27.775	590.824	8.20114	602.318	8.6432	572.407	26.6856	98%
SA55A - 21	0.767814	4.68748	30.6813	39.9593	63.8084	0.0523638	0.00281728	0.320751	0.0162785	0.0453297	0.00100011	0.434728	0.0153073	0.000634245	1.44669	301.91	124.058	282.48	12.5162	285.785	6.16945	307.051	12.6262	98%
SA55A - 22	0.24508	1.26264	0.417965	1.70542	81.0862	0.10333	0.0311557	0.693827	0.1382	0.0558168	0.00378333	0.340293	0.0712356	0.0366014	6.69747	1684.88	583.18	535.097	82.8462	350.135	23.1003	1390.86	690.6	58%
SA55A - 23	0.344883	0.466225	3.01604	8.74511	0	0.0585886	0.00431031	0.353949	0.0249279	0.045068	0.00101291	0.319122	0.0149041	0.00135532	3.14009	550.035	161.09	307.687	18.6957	284.171	6.24993	299.023	26.9917	92%
SA55A - 24	0.0345579	0.0973225	0.00283508	0.0820386	6.27253	0.820572	0.286093	6.83775	2.53265	0.0318271	0.00864413	0.733267	0.0183337	0.0362141	0.192271	error		2090.62	328.108	201.973	54.0049	367.209	718.789	-65%
SA55A - 25	0.377576	1.39611	6.83217	18.0948	40.1084	0.0514037	0.00350729	0.268877	0.0179077	0.0383646	0.000889239	0.348019	0.0131054	0.000830898	2.93954	257.47	157.387	241.795	14.331	242.688	5.52216	263.168	16.5771	99%
SA55A - 26	1.07885	0.593622	4.25058	3.9399	0	0.0584817	0.00805273	0.386786	0.0403628	0.0531659	0.00150132	0.270601	0.0210252	0.00176287	1.08294	546.33	310.147	332.019	29.5539	333.929	9.19132	420.56	34.8979	99%
SA55A - 27	0.375205	0.568662	3.99663	10.6519	0	0.048832	0.00378414	0.307528	0.0239345	0.0457392	0.00101368	0.284755	0.0150234	0.00110775	2.88571	138.975	183.305	272.263	18.5876	288.309	6.2507	301.397	22.0588	94%
SA55A - 28	0.496656	1.03532	4.87108	9.80775	33.6254	0.0570488	0.00526973	0.302748	0.0278757	0.0393104	0.00096959	0.267877	0.0132076	0.00108676	2.15811	494.485	204.45	268.544	21.7275	248.557	6.01546	265.207	21.6796	92%
SA55A - 29	0.180005	0.0168835	0.117845	0.654679	0	0.2232	0.0556823	0.757819	0.227999	0.0464948	0.00453752	0.324374	0.0664065	0.0445185	7.20285	3005.55	411.73	572.751	131.702	292.966	27.9516	1299.54	843.786	35%
SA55A - 30	0.527811	0.0713905	0.864064	1.63707	0	0.0808584	0.0174326	0.29817	0.0518312	0.027515	0.0014827	0.309998	0.0130074	0.00197393	2.19456	1218.21	433.793	264.97	40.5409	174.977	9.30266	261.213	39.3852	59%
SRM 610		2346.35	648.582	621.994	15324.3	0.896815	0.0077752	24.7851	0.292002	0.200226	0.00180038	0.763217	0.435966	0.00574403	1.02018	error	error	3299.79	11.7156	1176.53	9.69068	7313.55	80.8512	5%
91500std		16.2133	27.4998	74.4179	13.5747	0.0741875	0.00113329	1.83404	0.0357033	0.179192	0.00242611	0.69549	0.0522823	0.00111723	2.87433	1055.56	30.095	1057.73	12.812	1062.56	13.2755	1030.04	21.4598	99%
91500std		16.911	27.4403	74.7331	20.9695	0.0755725	0.00119926	1.86636	0.0386339	0.179148	0.00270468	0.729342	0.0557977	0.00125646	2.89067	1083.34	32.5575	1069.24	13.705	1062.32	14.7976	1097.46	24.0537	99%
GJ-1		15.0602	6.30167	267.726	30.3609	0.0587367	0.000803951	0.790497	0.0140112	0.0977104	0.00140628	0.812003	0.0298906	0.00137364	45.4817	566.7	29.625	591.454	7.95586	600.977	8.26492	595.302	26.9584	98%
SRM 610		4085.63	1246.45	958.644	8049.98	0.902808	0.012293	25.8228	0.58373	0.207403	0.00372037	0.793528	0.438001	0.0117296	0.828511	error	error	3339.85	22.2136	1214.97	19.8742	7342.18	164.869	6%
91500std		18.012	30.2879	80.7192	15.8142	0.0743094	0.000802786	1.83424	0.0325489	0.178967	0.00250452	0.788629	0.0537856	0.00111495	2.87554	1050.01	22.225	1057.8	11.683	1061.33	13.7063	1058.9	21.3853	99%
91500std		18.0383	29.7733	79.7235	21.6263	0.0754506	0.000771322	1.86616	0.0315384	0.179373	0.00240238	0.792489	0.0542944	0.00111772	2.88946	1080.56	20.3675	1069.17	11.1966	1063.55	13.1439	1068.65	21.4281	99%
GJ-1		24.8491	12.3692	434.101	17.8327	0.0595268	0.000465837	0.8015	0.0115278	0.0977069	0.00126586	0.900772	0.0324601	0.0010702	37.8231	587.065	21.29	597.674	6.51016	600.957	7.44097	645.668	20.951	99%
SA55A -N- 1	0.250139	0.300303	0.666661	2.66517	14.0236	0.0604947	0.00742307	0.347831	0.0362794	0.0446024	0.0015219	0.327142	0.0152648	0.00198952	4.45853	620.39	267.405	303.088	27.3318	281.298	9.39315	306.204	39.608	92%
SA55A -N- 2	0.431348	0.4134	0.960855	2.22757	18.2902	0.0570568	0.00797626	0.34603	0.0494093	0.0443824	0.00161028	0.254095	0.0228234	0.0031023	2.62476	494.485	312.923	301.731	37.2727	279.94	9.94056	456.126	61.3053	92%
SA55A -N- 3	0.308599	0.540762	0.836988	2.71222	28.3616	0.0548019	0.00613661	0.324866	0.0348603	0.0444891	0.00137384	0.287777	0.0190985	0.00224022	3.61829	405.605	253.667	285.639	26.7178	280.599	8.48048	382.383	44.4313	98%
SA55A -N- 4	0.183302	0.500169	0.704095	3.84117	14.0473	0.0903949	0.00691369	0.58155	0.0442421	0.0467028	0.00140536	0.395546	0.0467181	0.00431707	6.0878	1435.19	146.298	465.457	28.4059	294.247	8.65678	922.884	83.363	54%
SA55A -N- 5	0.469559	0.722001	3.77241	8.03394	16.6625	0.0528166	0.00332317	0.316358	0.0188584	0.0444056	0.000876004	0.330935	0.0145029	0.00095801	2.3232	320.43	142.572	279.098	14.5478	280.083	5.4091	291.03	19.0867	99%
SA55A -N- 6	0.139559	0.437758	0.386264	2.76776	12.9083	0.107346	0.0124337	0.636737	0.0854079	0.0406973	0.00127204	0.233022	0.0830904	0.0144631	9.21782	1754.62	212.963	500.284	52.9857	257.154	7.88066	1613.31	269.904	35%
SA55A -N- 7	0.322988	0.478684	0.81275	2.51635	12.0317	0.11469	0.0130286	0.730932	0.0817385	0.0457578	0.00131323	0.25664	0.047728	0.00696265	3.4328	1875.93	211.575	557.1	47.9502	288.424	8.09668	942.375	134.32	36%
SA55A -N- 8	0.206545	0.232211	0.117366	0.568237	14.2918	0.130473	0.057549	0.517972	0.187991	0.0466037	0.00284382	0.168133	0.0517942	0.00977458	5.9638	2105.55	856.023	423.796	125.749	293.636	17.5169	1020.67	187.837	63%
SA55A -N- 9	0.85172	0.806233	6.14692	7.21707	12.5231	0.0685855	0.00479662	0.337941	0.0222557	0.0368082	0.000873467	0.360331	0.0132824	0.000629469	1.27888	887.035	144.442	295.61	16.8914	233.018	5.43229	266.7	12.5562	76%
SA55A -N- 10	0.272982	0.414228	0.516153	1.8908	22.9156	0.0613577	0.00761735	0.30696	0.0322747	0.0396686	0.00135182	0.324108	0.0218928	0.00274333	4.10742	651.56	268.493	271.822	25.075	250.779	8.38296	437.728	54.2609	91%
SRM 610		4101.25	1250.74	963.463	7965.72	0.904224	0.00481293	25.9851	0.220672	0.208267	0.00154342	0.872653	0.442313	0.00467552	0.827226	error	error	3345.98	8.60944	1219.58	8.26083	7402.68	65.5216	6%
91500std		17.4513	29.4127	79.7831	18.695	0.0739353	0.000716698	1.82588	0.0280714	0.17921	0.00252199	0.915355	0.0530256	0.00101949	2.91603	1038.89	19.29	1054.8	10.112	1062.66	13.799	1044.32	19.5685	99%
91500std		18.4648	30.6848	81.2105	16.8046	0.0758247	0.000733323	1.87452	0.0280462	0.17913	0.0021277	0.793883	0.0550544	0.000971177	2.84897	1100	18.5175	1072.13	9.93371	1062.22	11.6464	1083.22	18.6054	99%
GJ-1		24.2774	12.4019	431.538	17.3316	0.059247	0.000547873	0.800601	0.0125843	0.0979834	0.00137031	0.889722	0.0289293	0.00100409	37.3874	575.96	13.885	597.167	7.10807	602.58	8.05188	576.427	19.7244	99%
SRM 610		3262.12	940.477	807.227	18768	0.903426	0.019663	25.3711	0.689254	0.203044	0.00439173	0.796172	0.431174	0.0145759	0.904651	error	error	3322.61	26.6348	1191.65	23.5415	7245.98	205.853	5%
91500std		17.8311	30.6445	81.514	0	0.0765267	0.00121163	1.89744	0.0404286	0.179272	0.00282511	0.739611	0.0531418	0.0013799	2.81666	1109.26	31.7925	1080.19	14.1869	1062.99	15.454	1046.55	26.4835	98%
91500std		17.5229	29.1215	80.6131	0	0.0732333	0.00129967	1.80296	0.0356339	0.179068	0.00297017	0.839237	0.0549382	0.00141662	2.94834	1020.37	37.0375	1046.53	12.9281	1061.88	16.2491	1080.99	27.142	98%
GJ-1		19.7559	9.19457	355.481	0.000126069	0.0595833	0.000809974	0.814834	0.0151127	0.0987933	0.00132226	0.721637	0.0287552	0.0013716	40.8999	587.065	24.9925	605.162	8.46541	607.333	7.7644	573.007	26.9483	99%
SA56A - 1	0.00237136	4.31973	0.505745	213.272	18.6485	0.0504069	0.00209539	0.195103	0.0112811	0.027543	0.0013126	0.824205	0.076518	0.0134045	547.768	213.035	91.6525	180.974	9.5854	175.152	8.23528	1490.28	251.677	96%
SA56A - 2	0.00264076	1.74687	0.140326	53.1384	44.0351	0.0635478	0.00281087	0.353907	0.0167833	0.0403242	0.000800833	0.418781	0.0554641	0.0241954	419.839	727.785	92.5825	307.655	12.5887	254.842	4.96431	1091.07	463.344	81%
SA56A - 3	0.00232511	0.24293	0.0361823	15.5616	8.15959	0.0631672	0.00676549	0.13508	0.0147027	0.0153831	0.000559632	0.334237	0.0330035	0.024298	96.2195	722.23	224.977	128.653	13.1526	98.4108	3.55336	656.303	475.425	73%
SA56A - 4	0.00140172	0.765676	0.0791339	56.4548	23.5234	0.0503889	0.00391297	0.0983734	0.0072535	0.0145694	0.000405232	0.377219	0.0998435	0.0347136	591.723	213.035	174.977	95.2738	6.70575	93.2425	2.57528	1923.56	637.945	97%
SA56A - 5	0.000844732	1.78619	0.0761072	90.0963	8.10596	0.0561556	0.00254515	0.27955	0.0138517	0.0361353	0.000891774	0.498056	0.0442896	0.0185358	1135.01	457.45	106.47	250.3	10.9933	228.833	5.54963	875.934	358.76	91%
SA56A - 6	0.00144198	0.497701	0.0573538	39.7742	15.787	0.0493379	0.0041691	0.0947556	0.00688027	0.0146083	0.000327934	0.309162	0.0297651	0.0112078	318.927	164.9	185.155	91.9238	6.38174	93.4899	2.08417	592.84	219.987	98%
SA56A - 7	0.00210468	4.51503	0.413878	196.646	34.3024	0.05155	0.00123415	0.299592	0.00865074	0.0421704	0.000815294	0.669551	0.0378648	0.00957321	600.748	264.88	55.55	266.081	6.76133	266.272	5.04511	751.198	186.437	99%
SA56A - 8	0.00690453	1.8565	0.66343	96.0862	80.9775	0.0495657	0.00333945	0.0975878	0.0067616	0.0142844	0.000257884	0.260559	0.0336343	0.00798362	190.49	176.01	157.385	94.5472	6.25552	91.4318	1.63976	668.641	156.116	96%
SA56A - 9	0.00385606	2.18635	0.283687	73.5691	44.0479	0.0570441	0.00224626	0.314166	0.0133897	0.0398288	0.000648564	0.38207	0.0702605	0.0128818	263.365	494.485	54.625	277.405	10.3472	251.771	4.02307	1372.45	243.278	90%
SA56A - 10	0.000756572	1.32868	0.0646866	85.4996	50.19	0.0520191	0.00360735	0.102015	0.00709894	0.0141537	0.000305261	0.309937	0.0596398	0.0107657	589.953	287.1	159.238	98.6351	6.54122	90.6011	1.94099	1170.87	205.352	91%
SRM 610		3241.13	934.762	799.119	19534.5	0.915362	0.00940457	25.449	0.332184	0.200989	0.00203708	0.776474	0.419586	0.00649674	0.884705	error	error	3325.6	12.9515	1180.63	10.9527	7081.67	92.5012	4%
91500std		16.766	27.3967	76.6044	0	0.0737311	0.0015069	1.82533	0.0428659	0.179463	0.00270265	0.641275	0.0550192	0.00145564	2.89167	1035.19	41.825	1054.6	15.4221	1064.04	14.7826	1082.55	27.8874	99%
91500std		16.7306	27.4117	75.7886	21.4214	0.0760289	0.00129919	1.87507	0.0385294	0.178877	0.00284359	0.773638	0.0530608	0.00139556	2.87333	1095.99	35.1875	1072.32	13.6269	1060.84	15.5601	1044.99	26.786	98%
GJ-1		19.9684	9.42293	356.405	0	0.0605873	0.000796612	0.812669	0.0141838	0.0970272	0.0012978	0.766364	0.0299977	0.00127263	39.5252	633.35	29.625	603.95	7.95582	596.964	7.63304	597.404	24.9736	98%
SA56A - 11	0.00107111	1.53686	0.061721	57.6236	20.471	0.056973	0.00260258	0.332105	0.0156477	0.0423113	0.000737298	0.369839	0.0595403	0.0466398	594.566	500.04	99.9875	291.172	11.9289	267.144	4.56227	1168.98	889.719	91%
SA56A - 12	0.00334268	1.02368	0.178077	53.2737	45.3372	0.0470371	0.00322955	0.0955068	0.00632789	0.0146107	0.000308777	0.318969	0.0669163	0.0299959	398.038	50.095	155.535	92.6203	5.86541	93.5054	1.96249	1309.2	568.257	99%
SA56A - 13	0.000204245	0.653778	0.00274611	13.4452	15.9243	0.108799	0.00899801	0.605555	0.0464261	0.0414613	0.00116592	0.366789	0.00679645	0	11.065	1788.89	151.853	480.753	29.3625	261.884	7.21815	136.907	0	41%
SA56A - 14	0.00243308	1.83018	0.176984	72.7408	23.193	0.0474917	0.00333025	0.249068	0.0203388	0.0362814	0.0019393	0.654566	0.0883474	0.0267683	389.771	72.315	159.235	225.819	16.5344	229.742	12.0645	1711.17	497.128	98%
SA56A - 15	0.00338894	1.25035	0.185678	54.7895	55.4789	0.0513483	0.00362034	0.105991	0.00753167	0.0156275	0.000444685	0.400441	0.0787449	0.0231404	308.895	257.47	161.09	102.291	6.91499	99.9624	2.82303	1532.05	433.578	97%
SA56A - 16	0.00693944	3.36923	1.1652	167.91	4.1513	0.0541359	0.00169455	0.268581	0.00843689	0.0359786	0.00035136	0.310886	0.0256806	0.00394369	163.084	375.98	74.9925	241.559	6.75495	227.858	2.18981	512.509	77.715	94%
SA56A - 17	0.00473258	0.856804	0.188091	39.7439	43.0252	0.0498778	0.00513839	0.0936626	0.00967845	0.0136727	0.000360489	0.255151	0.0501942	0.02165	303.161	190.82	222.19	90.9095	8.98592	87.5431	2.293	989.896	416.68	96%
SA56A - 18	0.000667973	1.44822	0.0452821	67.7903	66.582	0.0724977	0.00438723	0.131269	0.00798391	0.0133186	0.000292967	0.361665	0.047425	0.0278808	510.682	999.69	122.998	125.238	7.16655	85.2907	1.86433	936.529	538.018	62%
SA56A - 19	0.00355464	2.81025	0.16043	45.1327	174.609	0.059128	0.00507037	0.114033	0.00891426	0.0144759	0.000382796	0.338274	0.0829948	0.0557037	354.278	572.255	188.865	109.648	8.12522	92.6487	2.43297	1611.52	1039.61	83%
SA56A - 20	0.00247542	1.15344	0.164017	66.2583	0	0.0540999	0.00361514	0.190355	0.0185093	0.0242827	0.00152384	0.645381	0.302412	0.0795544	451.738	375.98	151.835	176.932	15.7891	154.666	9.59078	5340.43	1234.61	86%
SRM 610		3208.97	929.068	793.041	19016.5	0.907585	0.00844314	25.333	0.315017	0.202139	0.00184846	0.735377	0.428545	0.005823	0.951428	error	error	3321.14	12.355	1186.8	9.93296	7208.82	82.3886	5%
91500std		18.908	32.2176	82.382	28.7515	0.0753876	0.00134741	1.86581	0.0403498	0.179558	0.00250763	0.645778	0.0533293	0.00114502	2.86142	1079.63	35.95	1069.05	14.3148	1064.56	13.7165	1050.14	21.9716	99%
91500std		18.7821	31.616	81.994	21.183	0.0743724	0.00117319	1.83459	0.0374379	0.178782	0.00242615	0.665	0.0547507	0.00125829	2.90358	1051.55	31.4825	1057.93	13.43	1060.32	13.2802	1077.4	24.1127	99%
GJ-1		20.1389	9.19279	359.861	15.3639	0.0599459	0.000841411	0.800763	0.014432	0.0969151	0.00132857	0.760628	0.0309936	0.0011803	43.9555	611.13	29.6225	597.259	8.14778	596.305	7.81447	616.938	23.1393	99%
SA56A - 21	0.00411122	0.784009	0.410697	99.8966	5.35071	0.0512342	0.0031788	0.0997874	0.0054618	0.0143853	0.00027897	0.354307	0.036627	0.00894157	312.576	250.065	142.575	96.5801	5.04306	92.0727	1.77355	727.077	174.343	95%
SA56A - 22	0.00326029	1.00667	0.183833	56.3856	41.4789	0.0488348	0.00277583	0.0978842	0.00568023	0.0146112	0.000318503	0.375641	0.055636	0.0157985	499.548	138.975	-33.33	94.8214	5.25379	93.5086	2.02427	1094.36	302.493	98%
SA56A - 23	0.00121057	0.749122	0.0640834	52.9367	28.3866	0.0480054	0.00378929	0.0905478	0.00670738	0.0139089	0.000251231	0.243841	0.0458818	0.0111187	429.444	98.24	177.75	88.0135	6.24536	89.0444	1.59804	906.728	214.875	98%
SA56A - 24	0.142113	1.01188	3.64757	25.6667	11.8123	0.054113	0.0041812	0.26837	0.0190212	0.0370038	0.000814228	0.310452	0.0176596	0.00157146	8.66401	375.98	175.905	241.389	15.2282	234.234	5.06313	353.824	31.2116	96%
SA56A - 25	0.000914051	0.974442	0.0507991	55.5758	41.8657	0.0472399	0.00338829	0.0915208	0.00708684	0.0142014	0.000328804	0.299002	0.0774325	0.0350652	521.719	61.205	172.195	88.9191	6.59278	90.9039	2.0905	1507.45	657.81	97%
SA56A - 26	0.00248509	2.20241	0.277273	111.574	0	0.0555527	0.00220922	0.298958	0.0130869	0.0388217	0.000643652	0.378748	0.0295346	0.0161083	548.485	435.23	88.88	265.586	10.2315	245.525	3.99639	588.315	316.245	92%
SA56A - 27	0.00133948	1.2438	0.101062	75.4485	52.721	0.0505528	0.0039557	0.0934974	0.00707796	0.0136865	0.000365902	0.353154	0.0836613	0.0399393	656.128	220.44	181.457	90.7562	6.57263	87.6305	2.32739	1623.96	744.939	96%
SA56A - 28	0.03109	1.05364	1.50394	48.3738	7.72094e-05	0.0515027	0.00255937	0.281434	0.015778	0.0395655	0.000887288	0.400012	0.021546	0.00320582	36.9287	264.88	112.947	251.794	12.5033	250.139	5.50379	430.867	63.43	99%
SA56A - 29	0.00193178	3.52537	0.197352	102.161	25.2441	0.0618567	0.00340711	0.342769	0.019673	0.0404491	0.000790456	0.340486	1.23107	1.00594	573.399	733.34	118.503	299.268	14.8779	255.616	4.89945	16220	9113.23	84%
SA56A - 30	0.0170412	27.9217	2.00684	117.764	13.1458	0.0693734	0.0023987	0.420367	0.0194775	0.0431428	0.00103547	0.517995	0.665439	0.532678	139.944	909.26	76.085	356.314	13.9261	272.284	6.40071	10310	6464.73	73%
SRM 610		3202.19	926.537	795.079	19043	0.904835	0.00875914	25.2106	0.304831	0.201498	0.00195797	0.803636	0.428179	0.00679975	0.940588	error	error	3316.41	12.0224	1183.36	10.5246	7203.64	96.2331	5%
91500std		18.955	31.5145	82.4777	45.5026	0.0739031	0.00138958	1.82565	0.0388354	0.179256	0.00268708	0.70469	0.0540214	0.00133797	2.87524	1038.89	32.41	1054.72	13.9737	1062.91	14.7002	1063.42	25.6574	99%
91500std		18.3666	31.2475	82.1358	7.83811	0.0758569	0.00124799	1.87475	0.0373386	0.179084	0.00274758	0.770332	0.0540586	0.00158818	2.88976	1100	33.3325	1072.21	13.2084	1061.97	15.0328	1064.13	30.4544	99%
GJ-1		20.4162	9.45729	358.836	35.4704	0.0597459	0.000836357	0.806516	0.0134439	0.0977002	0.00117696	0.722695	0.0284613	0.00123698	41.9192	594.47	34.25	600.497	7.56741	600.917	6.91952	567.233	24.3103	99%
SRM 610		3978.53	1124.48	907.202	30680.8	0.905629	0.0210563	24.8648	0.660782	0.198397	0.00397864	0.754616	0.421339	0.0145589	0.835255	error	error	3302.92	26.0376	1166.7	21.4111	7106.61	207.035	4%
91500std		16.7017	27.0279	76.0428	0	0.0746439	0.00136649	1.84537	0.0361938	0.179452	0.00261274	0.742327	0.0539989	0.00137648	2.91506	1058.95	36.73	1061.78	12.9361	1063.98	14.2917	1062.99	26.3964	99%
91500std		16.8071	27.8881	76.4203	0	0.0751161	0.00131745	1.85503	0.0379377	0.178888	0.00263296	0.719688	0.0540811	0.00147628	2.84994	1072.22	35.645	1065.22	13.5119	1060.9	14.409	1064.57	28.308	99%
GJ-1		23.7041	10.5454	424.556	3.57515	0.0596679	0.000806306	0.810892	0.0152065	0.0981355	0.00134488	0.73079	0.0301107	0.0013485	41.9839	590.77	29.6225	602.954	8.53625	603.473	7.90161	599.621	26.4594	99%
SA57A - 1	0.101491	27.8974	88.4721	871.726	0	0.0537995	0.00126627	0.285865	0.0107742	0.0385812	0.00157357	1.08214	0.0163397	0.00140303	14.7783	361.165	53.6975	255.299	8.50965	244.033	9.76796	327.592	27.9025	95%
SA57A - 2	0.205218	58.1882	176.14	858.305	104.647	0.0570291	0.000685966	0.523131	0.00889843	0.0663378	0.000920334	0.815607	0.0241829	0.000740777	5.76005	500.04	27.775	427.241	5.93918	414.054	5.56826	482.973	14.6192	96%
SA57A - 3	0.00680587	57.3246	16.824	2471.98	94.0852	0.0512286	0.000536942	0.311362	0.00401054	0.0439482	0.000413381	0.730253	0.0144905	0.000720165	158.354	250.065	21.295	275.236	3.11098	277.259	2.55703	290.784	14.3482	99%
SA57A - 4	0.00582638	43.1597	11.2562	1931.93	74.2883	0.053877	0.000724356	0.28827	0.00592437	0.0386513	0.000552807	0.695932	0.0643938	0.007972	181.065	364.87	24.9975	257.196	4.67272	244.468	3.43355	1261.35	151.384	94%
SA57A - 5	0.561566	26.6967	104.416	185.937	47.0631	0.0591785	0.0011252	0.723752	0.0165698	0.0888897	0.00165215	0.811842	0.0296487	0.000747814	2.20948	572.255	40.73	552.879	9.76773	548.967	9.78551	590.554	14.6798	99%
SA57A - 6	0.00528189	45.853	11.4147	2161.1	0	0.0514632	0.00055294	0.299172	0.00382396	0.042047	0.000353466	0.657688	0.0146275	0.00094071	187.091	261.175	25.925	265.753	2.99412	265.509	2.19134	293.513	18.7397	99%
SA57A - 7	0.00732675	52.8049	17.6818	2413.33	39.3945	0.0506518	0.000481784	0.295573	0.0036447	0.0422255	0.00039658	0.761657	0.0130471	0.000632639	146.865	233.4	22.2175	262.937	2.86206	266.613	2.45716	262.006	12.6224	98%
SA57A - 8	0.545507	105.617	348.941	639.664	50.0093	0.0621196	0.000792277	0.840313	0.0130535	0.0978545	0.000929608	0.611553	0.0335982	0.000573324	1.97156	679.64	27.775	619.318	7.21448	601.823	5.46816	667.936	11.2115	97%
SA57A - 9	0.00241374	139.568	15.278	6329.62	0	0.0509881	0.000507506	0.305482	0.00465347	0.0433912	0.000576752	0.87256	0.021202	0.00110385	421.399	238.955	24.07	270.673	3.62407	273.819	3.56643	424.06	21.8481	98%
SA57A - 10	0.226254	29.6566	91.1656	402.935	65.4895	0.0573067	0.000838803	0.615315	0.0128093	0.0777373	0.00120549	0.744911	0.0244008	0.00059258	4.78574	501.89	63.88	486.907	8.05873	482.603	7.21526	487.273	11.6921	99%
SRM 610		3997.38	1131.03	911.093	30483.5	0.903607	0.00919934	25.2638	0.342076	0.202413	0.0020972	0.765203	0.434543	0.00675907	0.869132	error	error	3318.46	13.4161	1188.27	11.2619	7293.51	95.233	5%
91500std		18.3851	29.4629	79.6692	68.8117	0.0745796	0.00148885	1.84457	0.0415721	0.179463	0.00244692	0.604974	0.0545505	0.00148825	2.93113	1057.41	40.7425	1061.49	14.8569	1064.04	13.3861	1073.56	28.5248	99%
91500std		18.5251	31.9689	83.6063	0	0.0751804	0.00130959	1.85583	0.0391961	0.178877	0.00243282	0.64395	0.0535295	0.00134587	2.83387	1073.15	35.1825	1065.51	13.9549	1060.84	13.3156	1053.99	25.8209	99%
GJ-1		23.9373	10.6459	429.311	0	0.0602067	0.000804693	0.817682	0.0146013	0.098349	0.00125667	0.71556	0.0329637	0.00172559	44.1792	609.28	27.7725	606.755	8.16689	604.726	7.38285	655.524	33.765	99%
SA57A - 11	0.0140518	50.6982	28.9394	2059.48	23.5792	0.052771	0.000611283	0.318036	0.00461103	0.0436228	0.000420081	0.6642	0.0293714	0.0019986	91.396	320.43	23.145	280.391	3.55734	275.25	2.59908	585.111	39.2436	98%
SA57A - 12	0.856903	194.828	1506.08	1757.58	124.929	0.0531087	0.000624819	0.370411	0.00729659	0.0504725	0.000815963	0.820692	0.0169861	0.000371302	1.85126	344.5	27.775	319.958	5.41066	317.422	5.01024	340.444	7.37948	99%
SA57A - 13	0.00452492	74.4311	14.3658	3174.82	67.3171	0.0511279	0.000536455	0.32577	0.00490075	0.04619	0.000606559	0.872918	0.0153283	0.000878779	229.47	255.62	56.475	286.332	3.75844	291.088	3.7408	307.469	17.4939	98%
SA57A - 14	0.00499039	52.7397	11.9454	2393.68	0	0.0514448	0.000508079	0.311421	0.00380906	0.0438243	0.000373502	0.696799	0.0138906	0.000735074	211.425	261.175	22.22	275.282	2.95515	276.494	2.31149	278.828	14.6539	99%
SA57A - 15	0.0307643	26.1122	27.3642	889.481	16.6068	0.0578925	0.000858555	0.449162	0.0143174	0.0555359	0.00133608	0.754741	0.0312733	0.00134486	36.9121	524.11	36.1075	376.693	10.035	348.42	8.16192	622.42	26.3584	92%
SA57A - 16	0.115464	54.8708	172.491	1493.89	87.4861	0.052985	0.000592766	0.345293	0.00627483	0.0471819	0.000693903	0.8093	0.0217063	0.00130973	19.1131	327.835	25.925	301.175	4.74046	297.197	4.27466	434.039	25.9102	98%
SA57A - 17	0.00656659	43.9667	12.3653	1883.06	88.5779	0.05585	0.00107411	0.297912	0.010831	0.0383603	0.000896156	0.642567	0.103619	0.0190585	169.492	455.6	10.185	264.768	8.47526	242.661	5.56511	1992.82	349.046	91%
SA57A - 18	0.787897	56.9143	227.475	288.712	138.757	0.0597256	0.000895212	0.838578	0.0200938	0.101463	0.00181909	0.748215	0.0298829	0.000595752	1.73346	594.47	32.2425	618.361	11.1051	622.979	10.6517	595.151	11.6921	99%
SA57A - 19	0.0027903	142.003	16.7138	5989.97	0	0.0513003	0.000468704	0.346144	0.00561365	0.0487921	0.000649835	0.821231	0.016947	0.000958232	384.025	253.77	22.22	301.817	4.23929	307.101	3.99766	339.667	19.0452	98%
SA57A - 20	0.479081	23.2117	72.562	151.461	71.9211	0.0631955	0.00207093	0.71454	0.0425188	0.0799731	0.00326249	0.685567	0.0365556	0.00144498	2.35371	714.51	70.3625	547.438	25.1832	495.962	19.4758	725.685	28.1763	90%
SRM 610		3990.77	1133.62	913.941	29823.9	0.891677	0.00800903	24.8005	0.313581	0.201313	0.00212398	0.834428	0.440836	0.00719106	0.895999	error	error	3300.4	12.5434	1182.37	11.4154	7381.98	100.877	5%
91500std		18.7683	32.3936	83.6074	9.47857	0.0741273	0.00126498	1.82303	0.0350147	0.17873	0.00254466	0.741271	0.0542885	0.00144629	2.88387	1055.56	35.185	1053.78	12.6144	1060.03	13.9284	1068.54	27.7274	99%
91500std		18.8092	32.4185	83.5963	21.5007	0.0756327	0.00119454	1.87737	0.0387326	0.17961	0.00254227	0.68606	0.0537915	0.00155908	2.88113	1087.04	31.4775	1073.13	13.6877	1064.85	13.9051	1059.01	29.9039	99%
GJ-1		24.4795	10.7578	432.866	63.8139	0.0586258	0.000777831	0.787278	0.0139305	0.0972761	0.00133563	0.77596	0.0291067	0.00127871	45.1269	553.74	29.625	589.627	7.92433	598.426	7.85336	579.912	25.1146	98%
SRM 610		2459.73	575.118	566.679	42151.4	0.912196	0.0302576	22.9791	0.96079	0.182064	0.0053145	0.698141	0.423307	0.0197208	1.06059	error	error	3226.06	40.7432	1078.24	28.9886	7134.57	280.053	0%
91500std		17.0171	28.1099	75.4993	6.26413	0.0740678	0.00178021	1.83171	0.0541159	0.179305	0.00370546	0.699488	0.0549639	0.00202512	2.89343	1042.6	52.7775	1056.89	19.418	1063.18	20.2632	1081.49	38.7996	99%
91500std		23.7318	28.5676	76.6103	491.419	0.0756922	0.00203175	1.86869	0.0637355	0.179035	0.00419227	0.686543	0.0531161	0.0018318	2.87157	1087.04	54.1675	1070.07	22.5711	1061.7	22.9286	1046.05	35.1573	99%
GJ-1		16.0229	5.6419	240.561	193.48	0.0600642	0.00126664	0.804735	0.0218467	0.0973896	0.00210199	0.795035	0.0301279	0.0022225	46.6839	605.575	44.435	599.496	12.2982	599.093	12.352	599.96	43.6078	99%
SA57A-M-1	0.0125335	11.6535	8.82054	703.755	0	0.0526203	0.00121889	0.210364	0.00831601	0.0287957	0.000868112	0.762613	0.0184763	0.00219593	114.85	322.28	53.7	193.858	6.97761	183.007	5.44047	370.038	43.5794	94%
SA57A-M-2	0.00183697	72.6704	6.66657	3629.11	95.905	0.0518846	0.000704634	0.26943	0.00679462	0.0375731	0.00079451	0.838501	0.0440538	0.00441819	603.731	279.69	26.85	242.238	5.43733	237.773	4.93794	871.371	85.5335	98%
SA57A-M-3	0.00219621	126.608	12.358	5626.95	94.5218	0.0512465	0.000599456	0.308772	0.00696885	0.0436863	0.000889944	0.902599	0.0196865	0.00135096	516.643	253.77	23.145	273.229	5.40983	275.642	5.49883	394.042	26.7786	99%
SA57A-M-4	0.00193906	77.2211	6.57618	3391.43	273.843	0.0529605	0.000635032	0.314393	0.00923273	0.0431415	0.00122586	0.967584	0.0671249	0.00455571	547.601	327.835	27.775	277.58	7.13488	272.276	7.57701	1313.15	86.2889	98%
SA57A-M-5	0.00110506	8.4444	0.584872	529.269	12.1477	0.0508599	0.00168632	0.194613	0.0118106	0.0279319	0.00154767	0.913018	0.0433939	0.0126744	1347.89	235.25	71.285	180.557	10.0394	177.591	9.7063	858.59	245.523	98%
SA57A-M-6	0.00186981	74.9651	7.05337	3772.23	0	0.052839	0.000656553	0.272955	0.00505786	0.0374767	0.00049434	0.711851	0.0545629	0.00512589	588.927	320.43	27.775	245.053	4.03788	237.173	3.07428	1073.8	98.245	96%
SA57A-M-7	0.0506119	8.50826	15.7261	310.719	0	0.0558409	0.00265272	0.275454	0.0175816	0.0372057	0.00198815	0.837205	0.0350125	0.0017077	18.0364	455.6	102.767	247.045	13.9976	235.489	12.3574	695.574	33.3488	95%
SA57A-M-8	0.00225034	113.054	11.4	5065.9	247.137	0.0513892	0.000666821	0.304246	0.00616647	0.0430443	0.000661282	0.757983	0.0546721	0.00418706	483.905	257.47	29.6275	269.711	4.80423	271.675	4.08961	1075.89	80.2427	99%
SRM 610		2483.29	579.865	581.625	42073.8	0.904128	0.0108334	22.9375	0.425398	0.184386	0.00236268	0.690919	0.432002	0.00829891	1.08241	error	error	3224.3	18.1773	1090.89	12.8732	7257.68	117.136	1%
91500std		18.7035	31.7111	85.3333	0	0.0749406	0.00164493	1.85156	0.0622812	0.179146	0.00391365	0.649462	0.0546803	0.00183863	2.91207	1133.34	44.1375	1063.98	22.1889	1062.31	21.4037	1076.05	35.2361	99%
91500std		22.825	32.1989	85.048	301.497	0.0748194	0.0015815	1.84884	0.0615588	0.179194	0.00397741	0.666634	0.0533997	0.00176914	2.85293	1064.82	42.5925	1063.02	21.9526	1062.57	21.7513	1051.49	33.9457	99%
GJ-1		13.4308	5.70718	244.399	0	0.0608101	0.00138895	0.817603	0.0254048	0.0982283	0.0021946	0.719027	0.0294209	0.00267447	46.9943	631.5	48.14	606.71	14.1981	604.018	12.886	586.081	52.512	99%
